# Supplementary material
Source: PubMed Central journal article supplement (PMC3653371)
Supplement: Supp_Data.pdf [file Supp_Data.pdf]

## Supplementary Data

SUPPLEMENTARY TABLE S1. COMPARISON OF PUBLIC SECTOR HIV CLINICS ACROSS GAUTENG AND MPUMALANGA, SOUTH AFRICA

|                                                             | Gauteng                                                                                                                                 |                                                                                                               |                                                                                 |                                                                                                        | Mpumalanga                                                                                             |                                                          |
|-------------------------------------------------------------|-----------------------------------------------------------------------------------------------------------------------------------------|---------------------------------------------------------------------------------------------------------------|---------------------------------------------------------------------------------|--------------------------------------------------------------------------------------------------------|--------------------------------------------------------------------------------------------------------|----------------------------------------------------------|
|                                                             | Themba Lethu Clinic Central JHB                                                                                                         | Alex North JHB                                                                                                | Leratong West JHB                                                               | Witkoppen North JHB                                                                                    | Ederdale East JHB                                                                                      | ACTS Shongoa                                             |
| Demographics and clinical characteristics at ART initiation |                                                                                                                                         |                                                                                                               |                                                                                 |                                                                                                        |                                                                                                        |                                                          |
| Initiated on ART, <i>n</i>                                  | 13,985                                                                                                                                  | 4,966                                                                                                         | 5,393                                                                           | 3,669                                                                                                  | 3,383                                                                                                  | 7,222                                                    |
| region                                                      | Urban                                                                                                                                   | Periurban <sup>a</sup>                                                                                        | Periurban <sup>a</sup>                                                          | Urban                                                                                                  | Periurban <sup>a</sup>                                                                                 | Periurban <sup>a</sup>                                   |
| Gender, male, <i>n</i> , %                                  | 5,163 (36.9%)                                                                                                                           | 1,844 (37.1%)                                                                                                 | 1,949 (36.1%)                                                                   | 1,092 (29.8%)                                                                                          | 1,289 (38.1%)                                                                                          | 2,457 (34.0%)                                            |
| Age, median, IQR                                            | 36.0 (30.9–42.5)                                                                                                                        | 36.5 (30.9–43.2)                                                                                              | 35.8 (30.2–43.1)                                                                | 35.1 (30.0–41.4)                                                                                       | 35.8 (30.5–42.5)                                                                                       | 35.6 (29.3–43.7)                                         |
| Employed, <i>n</i> , %                                      | 6,418/13,985 (45.8%)                                                                                                                    | 2,163/4,965 (43.6%)                                                                                           | 1,211/5,393 (22.5%)                                                             | 1,787/3,669 (48.7%)                                                                                    | 1,401/3,368 (41.6%)                                                                                    | 1,413/7,222 (19.6%)                                      |
| Body mass index (BMI; kg/m <sup>2</sup> ), median, IQR      | 21.5 (19.0–24.8)                                                                                                                        | 21.8 (19.5–25.3)                                                                                              | 21.3 (18.8–24.6)                                                                | 23.5 (20.9–27.0)                                                                                       | 22.5 (19.9–26.0)                                                                                       | 21.9 (19.4–24.9)                                         |
| CD4 count, cells/mm <sup>3</sup> , median, IQR              | 92.0 (34.0–160.0)                                                                                                                       | 109.5 (50.0–170.0)                                                                                            | 103.0 (47.0–160.0)                                                              | 130.0 (65.0–195.0)                                                                                     | 97.0 (38.0–161.0)                                                                                      | 130.0 (65.0–183.0)                                       |
| Hemoglobin, g/dl, median, IQR                               | 11.4 (9.9–12.9)                                                                                                                         | 11.4 (10.0–12.8)                                                                                              | 11.1 (9.6–12.5)                                                                 | 11.6 (10.3–12.8)                                                                                       | 11.5 (10.0–12.8)                                                                                       | 10.3 (8.9–11.6)                                          |
| WHO stage III/IV, <i>n</i> , %                              | 5,330/12,346 (43.2%)                                                                                                                    | 1,281/2,471 (51.8%)                                                                                           | 1,557/2,767 (56.3%)                                                             | 720/1,732 (41.6%)                                                                                      | 914/2,300 (39.7%)                                                                                      | 3,492/4,537 (77.0%)                                      |
| Management of adolescent Patient identification             | Referred from adult clinic                                                                                                              | Patients identified according to age of presentation. Also transferred-in or referred from other institutions | Patients identified according to age and characteristics (i.e., school uniform) | Patients identified according to age. Transferred-in or referred from other institutions/ANC screening | Identified by age: 10–13 years old are accompanied by caregivers; 13–18 years are self referrals       | Patients identified according to age                     |
| Referred from pediatric to adult HIV care                   | No                                                                                                                                      | Yes (due to pregnancy)                                                                                        | Yes                                                                             | Yes                                                                                                    | Yes                                                                                                    | Yes                                                      |
| Patients initiated as adults                                | Yes                                                                                                                                     | Yes/10–14 year olds are initiated in pediatric clinic                                                         | Yes                                                                             | Yes                                                                                                    | Yes                                                                                                    | Yes                                                      |
| ARV drug or medical visits for adolescent                   | Seen once a month on an “adolescent day” for full assessment (medical visits, blood, and collect ARV(s) and engage in social activities | 1 day per week is dedicated for visits (i.e., Wednesday)                                                      | Visits are booked at 1–2 month intervals randomly for any day of the week       | First medical visit date is after 2 weeks to 1 month. Stable patients booked at 2–3 month intervals    | Visits are booked to coincide with the adolescent social support groups and usually after school hours | 1 day per week is dedicated for visits (i.e., Wednesday) |

(continued)

TABLE S1. (CONTINUED)

|                                            |                                                                                                                      | Gauteng                                                                                                                                                                                                                                               |                                                                                                                                                       |                                                                                                                                  |                                                                                                                              | Mpumalanga                                                                                                             |                                                                                           |         |
|--------------------------------------------|----------------------------------------------------------------------------------------------------------------------|-------------------------------------------------------------------------------------------------------------------------------------------------------------------------------------------------------------------------------------------------------|-------------------------------------------------------------------------------------------------------------------------------------------------------|----------------------------------------------------------------------------------------------------------------------------------|------------------------------------------------------------------------------------------------------------------------------|------------------------------------------------------------------------------------------------------------------------|-------------------------------------------------------------------------------------------|---------|
|                                            |                                                                                                                      | Themba Lethu Clinic Central JHB                                                                                                                                                                                                                       | Alex North JHB                                                                                                                                        | Leratong West JHB                                                                                                                | Witkoppen North JHB                                                                                                          | Edendale East JHB                                                                                                      | ACTS                                                                                      | Shongwe |
| Specialist consultants/<br>dedicated staff | Special Medical Officer, counselor and clerk                                                                         | Clinic has a multidisciplinary approach (dedicated team: pediatric specialist, social worker, pharmacy, dietician, and referral for psychology services). Adolescents 10–17 years are NOT seen in the adult clinic like the other sites in this study | Well experienced Medical Officers. Dietician, social worker, and counselor. Pediatrician consulted by telephone. No HIV infectious disease specialist | Dietician, psychologist, HIV infectious specialist, counselor, and on-site social worker support                                 | Pediatric specialist consultant and on-site social worker                                                                    | HIV infectious disease specialist; a nurse practitioner; 3 pediatric counselors; occupational therapist; social worker | Pediatrician consultant. Dietician, psychologist, and social workers are always available |         |
| Incentives                                 | A meal is provided to them on the “adolescent day.” Special social/educational activities (crafts)                   | Food parcels are given to those who need it                                                                                                                                                                                                           | OVC program provides cell phones, sanitary towels, etc.                                                                                               | Adolescent support group hosted once a month—with refreshments. Food parcels if there is a need                                  | None                                                                                                                         | Feeding program—bowl of soup and fruit on visit day. Memory box                                                        | None                                                                                      |         |
| How are adolescents treated differently?   | Adolescents meet on a special day. Special social/educational activities are arranged and a meal is provided to them | Visits booked on an “adolescent day.” Support groups, individual counseling, and social worker involvement                                                                                                                                            | Adolescent (orphans and nonorphans) attend sessions with educational and clinical psychologist in the OVC program                                     | One-on-one session with counselor, adolescent support group hosted once a month, psychologist is available for unresolved issues | Clinic visits after school hours that coincide with the adolescent social support group meeting—led by on-site social worker | Visits booked on an “adolescent day.” Specialist counselors are available                                              | One-on-one session with counselor. Visits booked on an “adolescent day.”                  |         |
| Initiating ART regimens prescribed         | DoH first-line—mainly TDF/3TC/EFV                                                                                    | DoH first-line                                                                                                                                                                                                                                        | DoH first-line—usually d4T/3TC/EFV                                                                                                                    | DoH first-line—usually d4T/3TC/EFV (Regimen 1A)                                                                                  | DoH first-line—usually d4T/3TC/EFV                                                                                           | DoH first-line—usually d4T/3TC/EFV (Regimen 1A)                                                                        | DoH first-line—usually d4T/3TC/EFV (Regimen 1A)                                           |         |

(continued)

TABLE S1. (CONTINUED)

|                                                                |  | Gauteng                                                                                                          |                                                                                                                                                                                                         |                                        |                                                                                                                  | Mpumalanga                                                          |                                                                                  |                                                                           |
|----------------------------------------------------------------|--|------------------------------------------------------------------------------------------------------------------|---------------------------------------------------------------------------------------------------------------------------------------------------------------------------------------------------------|----------------------------------------|------------------------------------------------------------------------------------------------------------------|---------------------------------------------------------------------|----------------------------------------------------------------------------------|---------------------------------------------------------------------------|
|                                                                |  | Themba Lethu Clinic<br>Central JHB                                                                               | Alex<br>North JHB                                                                                                                                                                                       | Leratong<br>West JHB                   | Witkoppen<br>North JHB                                                                                           | Edenrode<br>East JHB                                                | ACTS                                                                             | Stongwe                                                                   |
| Handling of regimen                                            |  | Patients previously on d4T are moved to TDF if they are suppressed (for ease of dosing) or switched to Regimen 2 | Changes to the second line are often based on genotyping (if available). Lamivudine (3TC) monotherapy is used as a holding strategy in consultation with a specialist in certain cases of viral failure | Most adolescents are on adult regimens | TDF not prescribed for children less than 18 years. Children over the weight of 40 kg are provided adult dosages | Patients switched to adult dosages based on weight                  | Children over the weight of 40 kg are provided adult dosages                     | 1A, however, prefers to prescribe the medication once a day for adherence |
| Switch from pediatric to adult regimens                        |  | Adolescents are on adult regimens                                                                                | Most patients are kept on ABC/3TC/EFV until 18 years of age. Switched due to d4T toxicity                                                                                                               | Most adolescents are on adult regimens | TDF not prescribed to children less than 18 years. Children over the weight of 40 kg are provided adult dosages  | Switched due to d4T toxicity. Switch is based on weight and not age | Switch is based on weight and not age                                            | Dosages are based on the weight of the patient                            |
| Information on disclosure of HIV status to adolescent recorded |  | No                                                                                                               | Yes                                                                                                                                                                                                     | Yes                                    | Yes                                                                                                              | Yes                                                                 | Yes                                                                              | Yes                                                                       |
| Other adolescent health care services provided                 |  | Male circumcision                                                                                                | Cervical screening available and referral for male circumcision                                                                                                                                         | Male circumcision                      | Cervical screening available and referral for male circumcision                                                  | Social support group                                                | Male circumcision                                                                | Male circumcision                                                         |
| HIV transmission—perinatal or behavioral                       |  | Not specifically stated                                                                                          | Not specifically stated                                                                                                                                                                                 | Not specifically stated                | Not specifically stated                                                                                          | Not specifically stated                                             | Not specifically stated (assessed by history, parental status, history of abuse) | Assessed by time on antiretroviral therapy                                |

<sup>a</sup>Periurban areas can be described as those immediately adjoining urban areas, localized outside formal urban boundaries and urban jurisdictions, that are in a process of urbanization and that therefore progressively assume many of the characteristics of urban areas.

<sup>b</sup>Rural areas are settled places outside towns and cities; their inhabitants generally live in villages, on farms, and in other isolated houses. AR, antiretroviral; DoH, Department of Health; ART, antiretroviral therapy; IQR, interquartile range.
